# Supplementary material for: Ultraviolet-visible spectroscopic characterisation of automotive window tints for forensic purposes
Source: Royal Society of Chemistry journal article supplement (doi:10.1039/c5ay01381j), 2015-01-01

## Ultraviolet-Visible Spectroscopic Characterisation of Automotive Window Tints for Forensic Purposes

Karin J. van der Pal,<sup>a, b</sup> Mark Maric,<sup>a, b</sup> Wilhelm van Bronswijk<sup>b</sup> and Simon W. Lewis<sup>a, b\*</sup>

<sup>a</sup>Nanochemistry Research Institute, GPO Box U1987, Perth, Western Australia 6845

<sup>b</sup>Department of Chemistry, Curtin University, GPO Box U1987, Perth, Western Australia 6845, Australia.

E-mail: S.Lewis@curtin.edu.au; Tel: +61 8 9266 2484.

### Supporting Information

**Table S1 :List of window tints used in study**

| Manufacturer   | Tint               | Transmission |
|----------------|--------------------|--------------|
| Altrex         | Dark Smoke         | 20%          |
| John Hughes    | UltraPlus Black    | 20%          |
| John Hughes    | UltraPlus Black    | 35%          |
| John Hughes    | UltraPlus Security | 35%          |
| Tint-A-Car     | UV                 | 5%           |
| Tint-A-Car     | VLT                | 17%          |
| Tint-A-Car     | Octane             | 20%          |
| Tint-A-Car     | Octane             | 35%          |
| Tint-A-Car     | EMI                | 35%          |
| Tint-A-Car     | Security           | 41%          |
| DIY Home Tint  | Black              | 5%           |
| DIY Home Tint  | Dark Black         | 8%           |
| DIY Home Tint  | Medium Black       | 15%          |
| DIY Home Tint  | Black              | 35%          |
| DIY Home Tint  | Light Black        | 35%          |
| Protint        | Black              | 5%           |
| Protint        | Black              | 10%          |
| Protint        | Black              | 15%          |
| Protint        | Black              | 30%          |
| Protint        | Black              | 35%          |
| Protint        | Black              | 48%          |
| Hanita Pacific | Night Owl          | 5%           |
| Hanita Pacific | Natura             | 15%          |
| Hanita Pacific | Natura             | 28%          |

Fig. S1. Variance plot for Window Tint PCA

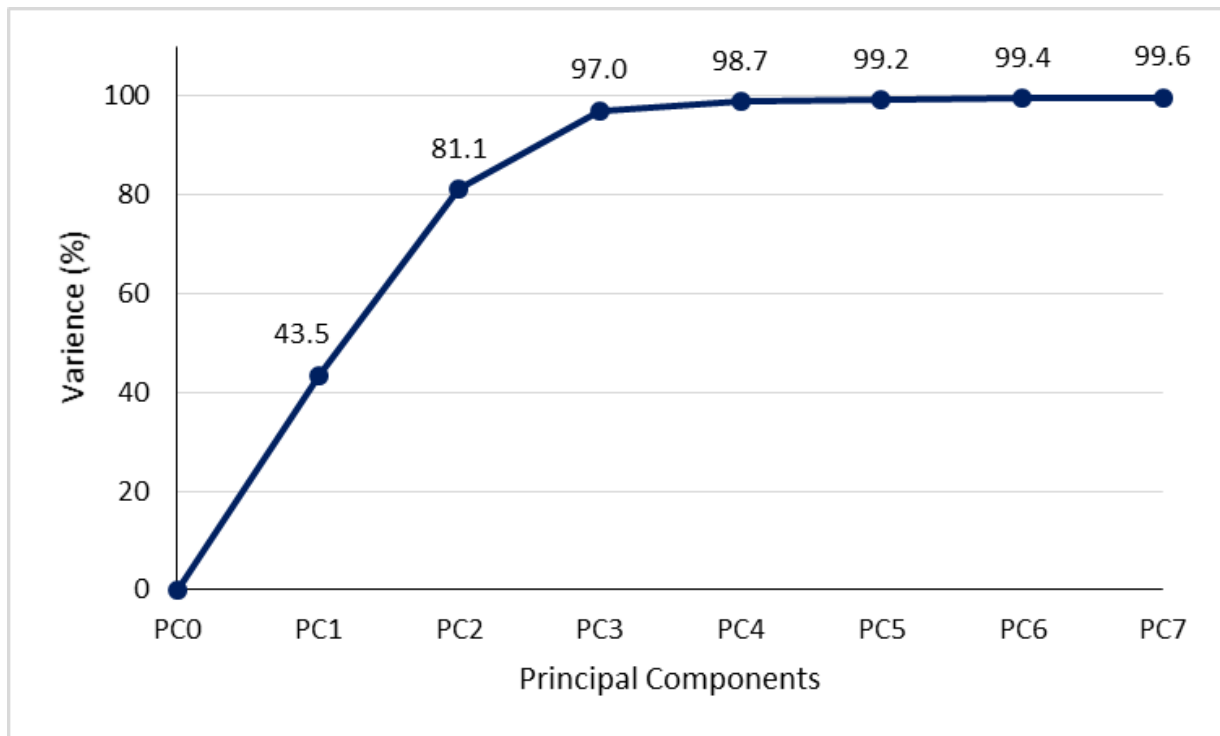

Supplement: c5ay01381j1.pdf [file c5ay01381j1.pdf]
